# Supplementary material
Source: Springer Nature journal article supplement (https://www.springermedizin.de/resource/supplementary/12913_2008_654_MOESM1_ESM.pdf/9535892)

Mean  $\pm 2$  SE Total FIM Efficiency Gain

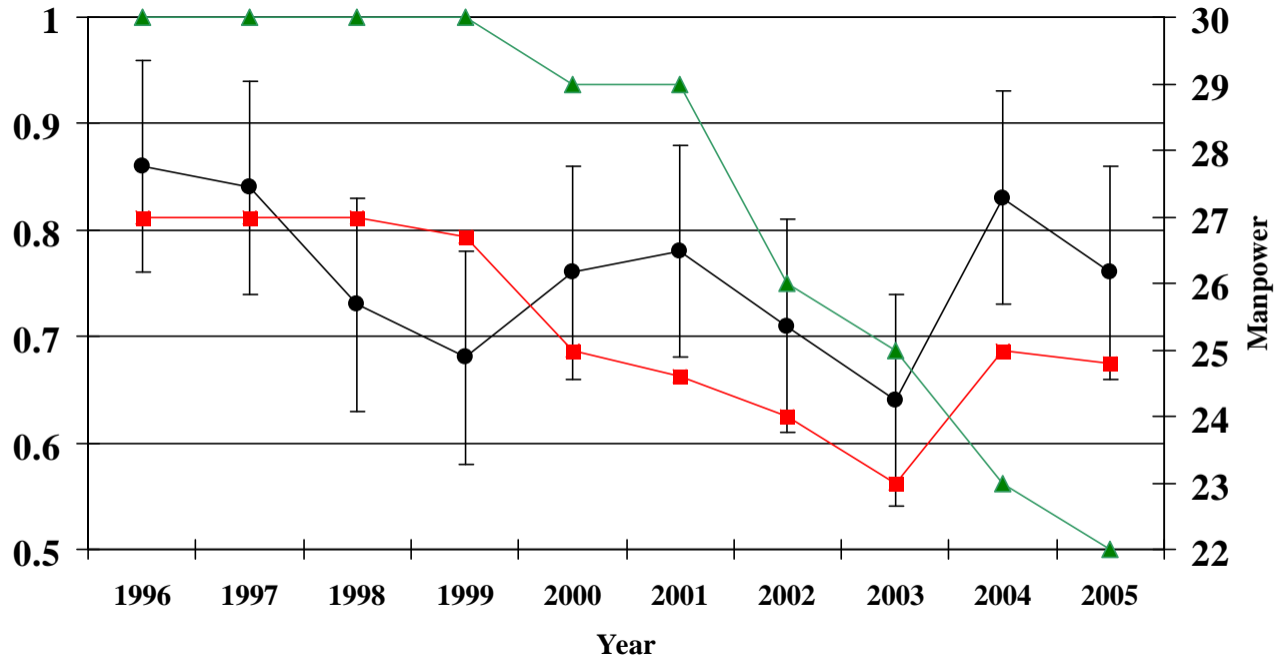

Supplement: MOESM1 [file 9535892]
